# Supplementary material for: Intrauterine Hyperglycemia Alters the Metabolomic Profile in Fetal Mouse Pancreas in a Gender-Specific Manner
Source: PubMed Central journal article supplement (PMC8439196; doi:10.3389/fendo.2021.710221), 2021-08-31
Supplement: DataSheet_1.pdf [file DataSheet_1.pdf]

**Supplementary Table 1 Top 30 Differential metabolites discriminating GDM-F1 from Ctrl-F1 group**

| Num | Male                           |         |                     | Female                                   |        |                     |
|-----|--------------------------------|---------|---------------------|------------------------------------------|--------|---------------------|
|     | Metabolite                     | VIP     | Log <sub>2</sub> Fc | Metabolite                               | VIP    | Log <sub>2</sub> Fc |
| 1   | 5-Acetamidovalerate            | 1.67642 | -1.2607             | N-Acetylaspartylglutamic acid            | 1.9135 | -2.9967             |
| 2   | 2-Dehydro-3-Deoxy-L-Rhamnonate | 1.66904 | -1.6346             | 1-Methylhistamine                        | 1.9021 | -2.4103             |
| 3   | Cyclic AMP                     | 1.6413  | -2.3855             | Niacinamide                              | 1.8875 | -2.798              |
| 4   | 3-Methylindole                 | 1.6304  | -2.1794             | UMP                                      | 1.8464 | -1.2112             |
| 5   | 5-Methylcytosine               | 1.63032 | -1.1984             | 5,6-Dihydro-5-Fluorouracil               | 1.835  | -1.9066             |
| 6   | 1-Naphthylamine                | 1.62067 | -1.8825             | 4-Hydroxybutanoic acid                   | 1.8287 | -2.1325             |
| 7   | 5,6-Dihydro-5-Fluorouracil     | 1.61359 | -1.1115             | Dimethyl Sulfone                         | 1.7964 | -1.2283             |
| 8   | Biotinyl-5-AMP                 | 1.61343 | -1.8822             | Cyclic GMP                               | 1.7879 | -1.2135             |
| 9   | Niacinamide                    | 1.60653 | -1.0952             | 5-Hydroxyindoleacetic acid               | 1.7853 | -1.4381             |
| 10  | Cyclic GMP                     | 1.60563 | -1.7154             | 2-Dehydropantoate                        | 1.7624 | -1.4272             |
| 11  | Guanine                        | 1.60365 | -1.1958             | Citric acid                              | 1.7517 | 1.7138              |
| 12  | Oxoglutaric acid               | 1.59682 | -3.6951             | L-Pipecolic acid                         | 1.7406 | -0.8479             |
| 13  | L-Rhamnofuranose               | 1.59649 | -2.9689             | cis-Aconitic acid                        | 1.7316 | -1.1789             |
| 14  | Dimethyl Sulfone               | 1.58247 | -1.3775             | 3-Methylindole                           | 1.7316 | -1.5618             |
| 15  | 5-Benzoylphosphoadenosine      | 1.57799 | -1.4921             | N-Acetyl-Alpha-D-Glucosamine 1-Phosphate | 1.723  | -0.5697             |
| 16  | UMP                            | 1.57691 | -1.8931             | Oxoglutaric acid                         | 1.7178 | -2.061              |
| 17  | 2-Dehydropantoate              | 1.57506 | -2.0018             | Mesaconate                               | 1.716  | -1.8023             |
| 18  | Mesaconate                     | 1.56956 | -1.517              | N-Acetyl-D-Mannosamine 6-Phosphate       | 1.7032 | -1.176              |
| 19  | Cytosine                       | 1.55417 | -1.8728             | Gamma-Aminobutyric acid                  | 1.692  | -4.0597             |
| 20  | D-Xylose                       | 1.55335 | -1.8531             | 3-Hydroxyanthranilic acid                | 1.6914 | -2.088              |
| 21  | L-Leucine                      | 1.55278 | -1.1951             | 2-Aminoacrylic acid                      | 1.6888 | -0.9971             |

|    |                            |         |         |                                       |        |         |
|----|----------------------------|---------|---------|---------------------------------------|--------|---------|
| 22 | 2-Phenylacetamide          | 1.55016 | -1.9864 | 5-Acetamidovalerate                   | 1.687  | -3.4505 |
| 23 | L-Valine                   | 1.54894 | -1.2248 | 1-Naphthylamine                       | 1.6854 | -1.7382 |
| 24 | 2-Isopropyl-3-Oxosuccinate | 1.54748 | -1.1923 | Guanidoacetic acid                    | 1.68   | -0.6874 |
| 25 | Benzoate                   | 1.5467  | -1.301  | (R)<br>2,3-Dihydroxy-3-Methylvalerate | 1.6692 | -1.4763 |
| 26 | Beta-Alanyl-L-Arginine     | 1.5397  | -1.1874 | 1,1-Dimethylbiguanide                 | 1.6689 | -1.0331 |
| 27 | 3-Hydroxyanthranilic acid  | 1.53468 | -2.0093 | L-Rhamnofuranose                      | 1.6644 | -1.5387 |
| 28 | Pyrimidodiazepine          | 1.53241 | -1.831  | Cyclic AMP                            | 1.6605 | 1.1049  |
| 29 | N-Acetyl-L-Aspartic acid   | 1.5285  | -2.3888 | Pyroglutamic acid                     | 1.6596 | -1.2623 |
| 30 | Gamma-Aminobutyric acid    | 1.52831 | -1.7748 | Desmosterol                           | 1.6486 | -2.3689 |

a. Only metabolites with VIP values  $> 1.0$  and  $P < 0.05$  were considered statistically significant.

b. Fc, Fold-change, calculated as the average mass response (area) ratio between the two classes, positive Fc values indicate significantly higher levels in GDM relative to Ctrl group, and negative fold change values indicate significantly lower levels in GDM relative to Ctrl group.

**Supplementary Table 2** Differential metabolites in GDM-F1 male fetal pancreas. (See excel document 1)

**Supplementary Table 3** Differential metabolites in GDM-F1 female fetal pancreas. (See excel document 2)

## Supplementary figure legends

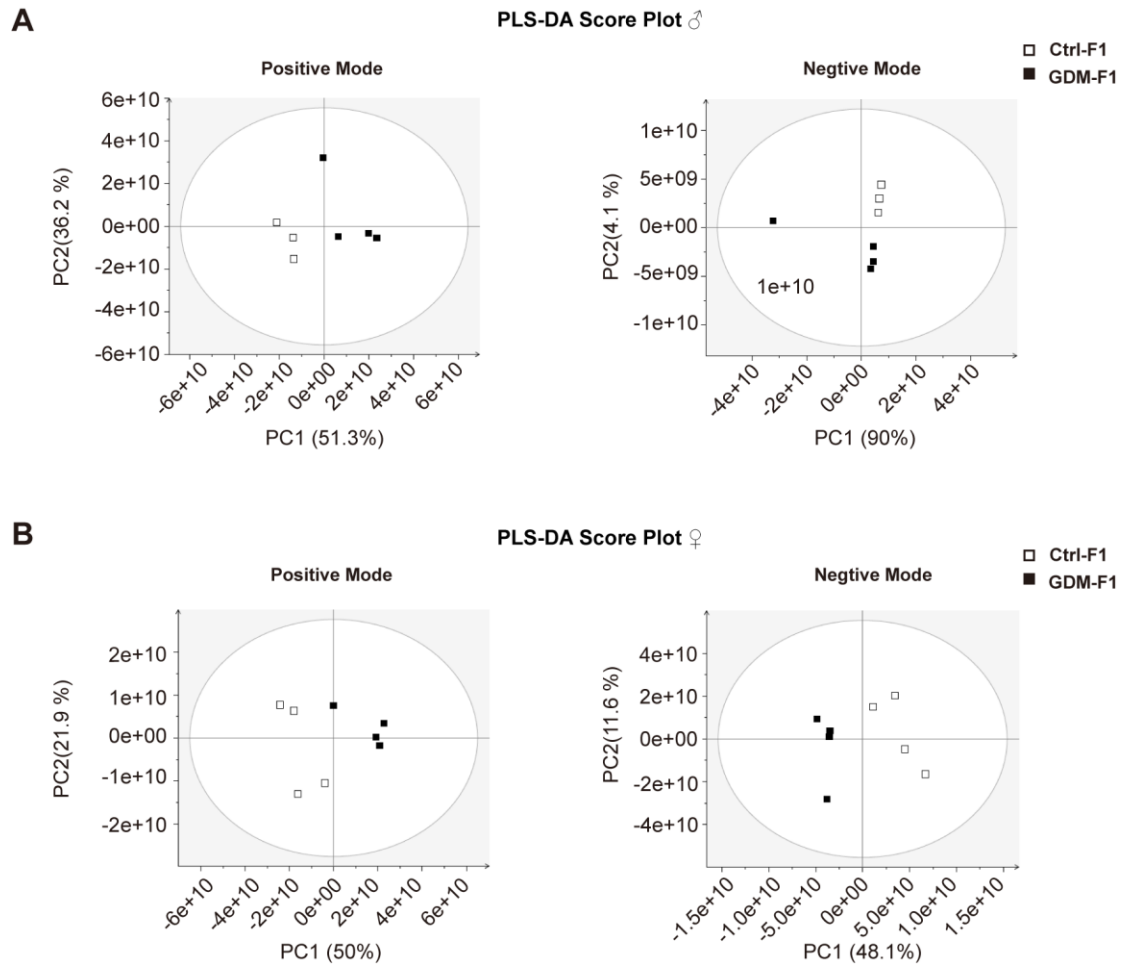

**Supplementary Fig 1. PLS-DA score plot of UPLC-MS of fetal pancreas. (A)** PLS-DA results for male fetal group. **(B)** PLS-DA results for female fetal group.
